# Supplementary material
Source: PubMed Central journal article supplement (PMC11113173)
Supplement: 18_2014_1658_MOESM1_ESM.pdf [file 18_2014_1658_MOESM1_ESM.pdf]

Title: A tale of tails: Deciphering the contribution of terminal tails to the biochemical properties of two Dps proteins from *Streptomyces coelicolor*.

Journal: Cellular and Molecular Life Sciences.

Matthew D. Hitchings<sup>1</sup>, Philip Townsend<sup>2</sup>, Ehmke Pohl<sup>2</sup>, Paul D. Facey<sup>1</sup>, D. Hugh Jones<sup>1</sup>, Paul J. Dyson<sup>1</sup> and Ricardo Del Sol<sup>1</sup>.

<sup>1</sup>College of Medicine, Swansea University. Singleton Park, Swansea. SA2 8PP. United Kingdom.

<sup>2</sup>Durham University Department of Chemistry and School of Biological and Biomedical Sciences, University Science Laboratories, Durham University, South Road, Durham DH1 3LE. United Kingdom

**Correspondence: R. Del Sol, e-mail: e.r.abascal@swansea.ac.uk**

**Supplementary Fig. 1: Aligned amino acid sequences of DpsA, DpsB and DpsC (A). Predicted  $\alpha$ -helices are indicated. Synthetic Dps mutant coding sequences used in this study (B). NdeI and BglIII sites introduced at 5' and 3' ends are underlined.**

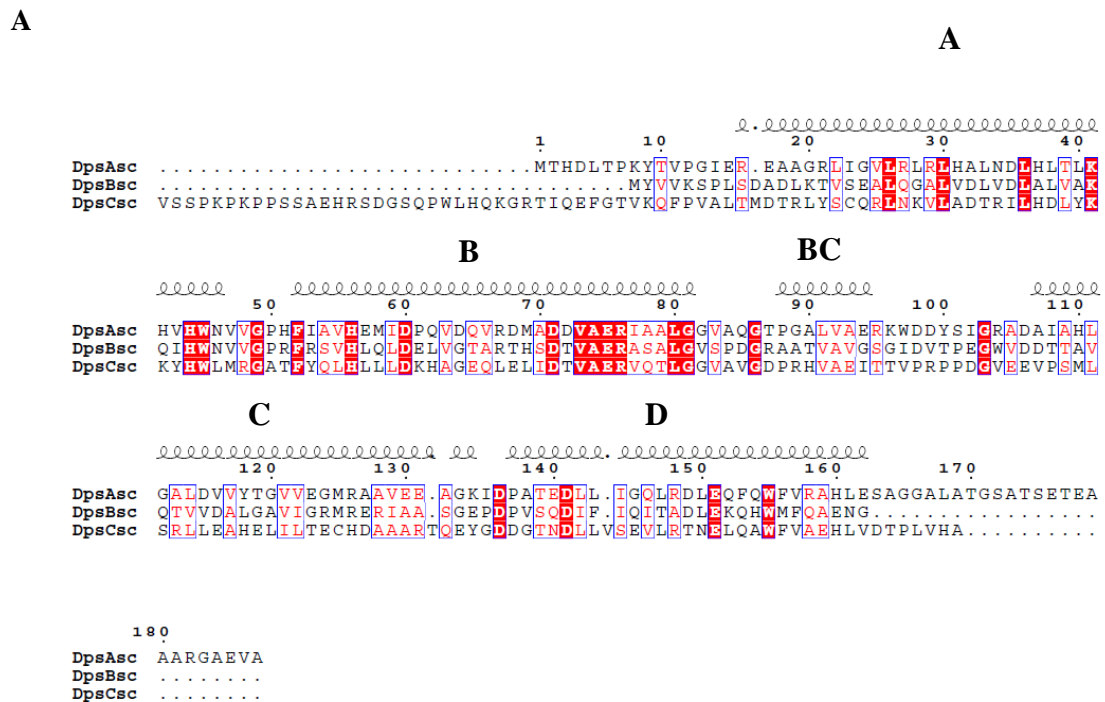

**B**

*dpsA-DNT*

cat ATG CGT GAA GCG GCT GGT CGT CTG ATT GGG GTT CTC CGC TTA CGC CTC CAT GCC CTG AAT GAC CTT CAT CTG ACG CTG AAA CAC GTG CAC TGG AAC GTC GTT GGC CCG CAC TTT ATC GCG GTG CAT GAG ATG ATC GAT CCG CAA GTC GAT CAG GTC CGC GAC ATG GCG GAT GAT GTT GCC GAA CGC ATT GCT GCG TTG GGA GGT GTA GCG CAA GGT ACA CCA GGC GCG CTG GTA GCA GAA CGC AAG TGG GAT GAC TAC TCG ATT GGT CGC GCA GAT GCC ATT GCG CAT CTG GGC GCA CTT GAC GTG GTG TAT ACC GGC GTA GTG GAA GGA ATG CGT GCA GCC GTT GAA GAA GCC GGG AAA ATC GAC CCT GCT ACC GAG GAT CTG CTG ATT GGC CAG TTA CGG GAT TTG GAG CAG TTC CAG TGG TTT GTG CGT GCC CAT CTG GAG AGC GCA GGC GGT GCA CTG GCC ACT GAT GCG ACG TCC GAA ACC GAA GCG GCT GCC CGT GGT GCG GAA GTC GCa gatct

*dpsA-DTM*

cat ATG CGC GAA GCT GCT GGT CGC CTG ATT GGC GTG TTA CGC CTG CGT CTG CAT GCG TTG AAC GAC CTC CAT CTG ACC CTG AAA CAC GTT CAC TGG AAT GTC GTT GGC CCG CAC TTT ATC GCC GTT CAT GAG ATG ATC GAT CCT CAG GTG GAC CAA GTG CGC GAT ATG GCT GAC GAT GTC GCG GAA CGC ATT GCA GCC CTC GGA GGA GTT GCA CAA GGG ACT CCA GGT GCG CTT GTA GCG GAG CGT AAA TGG GAC GAT TAC AGC ATT GGC CGT GCA GAT GCC ATT GCC CAT TTA GGT GCG CTG GAT GTG GTG TAT ACC GGT GTC GAA GGC ATG CGT GCC GCG GTA GAA GAA GCC GGC AAG ATC GAT CCG GCA ACC GAG GAC CTG TTG ATT GGC CAG CTT CGG GAT CTG GAA CAG TTC CAG TGG TTT GTA CGC GCG CAT CTG GAAgat ct

*dpsC-DNT*

cat ATG ATG GAT ACT CGC CTG TAT AGC TGT CAA CGC CTG AAC AAA GTC CTC GCA GAT ACG CGG ATT CTG CAT GAC CTC TAC AAG AAA TAC CAC TGG CTG ATG CGT GGA GCG ACC TTC TAT CAG CTG CAC CTG TTA CTG GAC AAA CAC GCT GGT GAA CAG TTG GAG CTG ATT GAC ACG GTT GCG GAA CGC GTA CAG ACG TTA GGT GGC GTA GCG GTT GGT GAT CCG CGT CAT CTG GCG GAA ATC ACA ACC GTT CCG GCT CCT CCG GAT GGG GTG GAA GAG GTG CCC AGT ATG CTG TCC CGT TTG TTG GAA GCC CAC GAA CTG ATC CTT ACC GAG TGC CAT GAT GCC GCT GCA CGC ACT CAG GAG TAT GGC GAT GAT GGC ACC AAC GAC TTA CTG GTT TCG GAA GTG CTT CGC ACC AAT GAA CTG CAA GCC TGG TTT GTC GCG GAA CAT CTC GTG GAT ACA CCA CTG GTC CAT GCAGatct

**Supplementary Fig. 2: DpsA and DpsC protect DNA from H<sub>2</sub>O<sub>2</sub>-mediated oxidative damage.** Reactions were set using 40 ng of pUC18 (supercoiled in A and B, linearised with HindIII in C and D), 2 µg of protein (DpsA or DpsC), 50 µM FeSO<sub>4</sub> and initiated by adding 5 mM H<sub>2</sub>O<sub>2</sub> as indicated followed by 5 minutes incubation at room temperature. Samples in panels A and B are: Lane 1- DNA, lane 2- DNA with FeSO<sub>4</sub>, lane 3-DNA with H<sub>2</sub>O<sub>2</sub>, lane 4- DNA with Dps protein, lane 5- DNA with FeSO<sub>4</sub> and H<sub>2</sub>O<sub>2</sub> and lane 6-DNA with Dps protein, FeSO<sub>4</sub> and H<sub>2</sub>O<sub>2</sub>. Protein used in each panel is indicated.

Samples in panel C are: Lane 1-plasmid DNA, lane 2- DNA and FeSO<sub>4</sub>, lane 2- DNA with H<sub>2</sub>O<sub>2</sub>, lane 4- DNA with FeSO<sub>4</sub> and H<sub>2</sub>O<sub>2</sub>, lane 5- DNA with DpsA, lane 6- DNA with DpsA-DCT, lane 7- DNA with DpsA-DNT, lane 8- DNA with DpsA-DTM, lane 9- DNA with FeSO<sub>4</sub>, H<sub>2</sub>O<sub>2</sub> and DpsA, lane 10- DNA with FeSO<sub>4</sub>, H<sub>2</sub>O<sub>2</sub> and DpsA-DCT, lane 11- DNA with FeSO<sub>4</sub>, H<sub>2</sub>O<sub>2</sub> and DpsA-DNT, lane 12- DNA with FeSO<sub>4</sub>, H<sub>2</sub>O<sub>2</sub> and DpsA-DTM. Panel D shows DpsA protection against oxidative damage of DNA mediated by CuSO<sub>4</sub>. Samples in lanes are as panels A and B, but using 50 µM CuSO<sub>4</sub>.

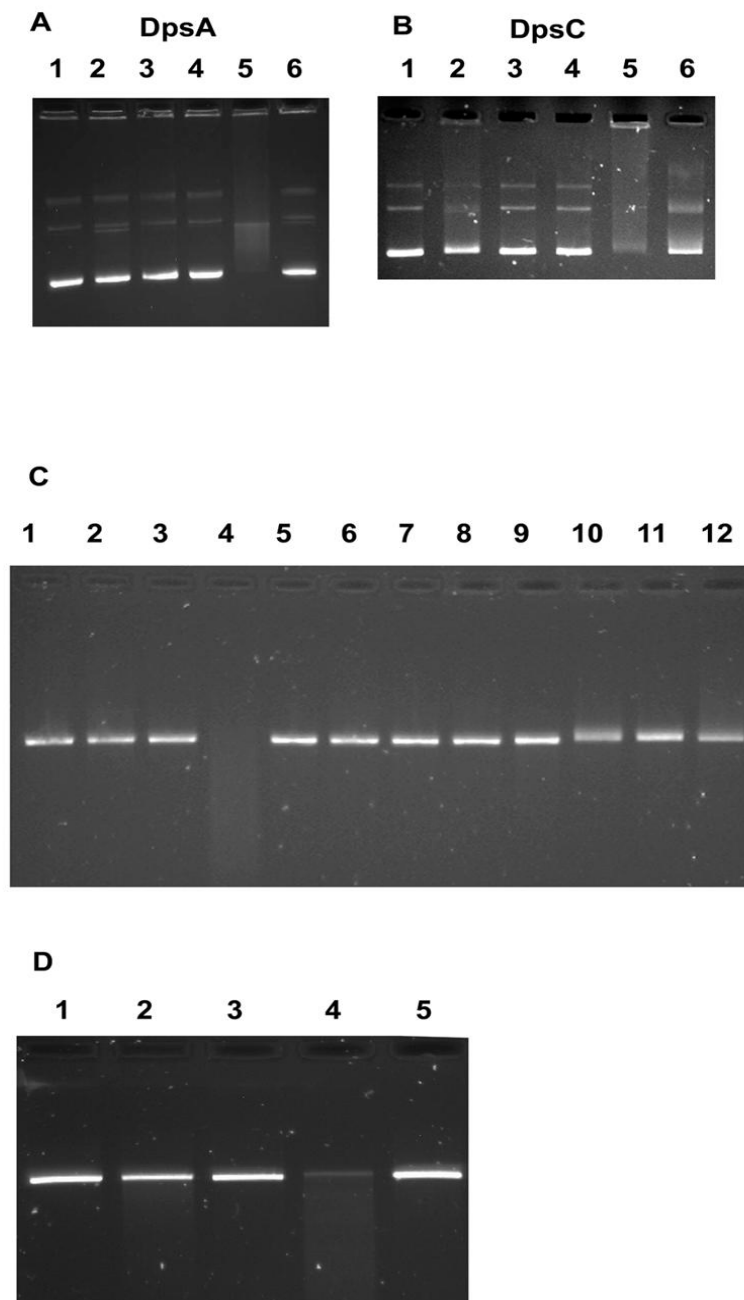

**Supplementary Table 1: Specific activity of DpsA and mutant variants.** Specific activities were calculated as change in absorbance per second/mg of protein used in the reaction, using the linear portion of the curves. The data used was collected from three independent replicates using 276  $\mu$ M substrate concentration and 0.2 mg/ml of protein ( $\sim$ 0.74  $\mu$ M).

| <b>Protein</b>  | <b>SA (<math>\Delta</math>Abs<sub>310</sub>/s/mg)</b> | <b>St dev</b> |
|-----------------|-------------------------------------------------------|---------------|
| <b>DpsA</b>     | 0.00012                                               | 1.50E-05      |
| <b>DpsA-DCT</b> | 0.00058                                               | 2.2E-05       |
| <b>DpsA-DTM</b> | 0.00008                                               | 7.86E-06      |
| <b>DpsA-DNT</b> | 0.00005                                               | 3.93E-06      |

**Supplementary Table 2: Data collection, phasing and refinement statistics**

|                                       | DpsA                 | DpsA-DCT             | DpsC                |
|---------------------------------------|----------------------|----------------------|---------------------|
| <b>Data Collection</b>                |                      |                      |                     |
| X-ray source                          | i04                  | i04                  | i02                 |
| Wavelength (Å)                        | 0.9795               | 0.9795               | 0.9795              |
| Space group                           | F 41 3 2             | P 42 3 2             | P 21 21 21          |
| Cell dimensions                       |                      |                      |                     |
| <i>a</i> , <i>b</i> , <i>c</i> (Å)    | 209.66 209.66 209.66 | 105.33 105.33 105.33 | 92.22 153.12 170.28 |
| $\alpha$ , $\beta$ , $\gamma$ (°)     | 90.00 90.00 90.00    | 90.00 90.00 90.00    | 90.00 90.00 90.00   |
| Resolution (Å)                        | 1.78                 | 1.86                 | 1.78                |
| $R_{\text{merge}}$ (%) <sup>a,b</sup> | 0.090 (0.390)        | 0.084 (0.821)        | 0.077 (0.974)       |
| $I/\sigma(I)$ <sup>a</sup>            | 19.4 (6.5)           | 19.8 (4.2)           | 15.6 (2.4)          |
| Completeness (%) <sup>a</sup>         | 99.9 (99.8)          | 99.9 (99.9)          | 100 (100)           |
| Multiplicity <sup>a</sup>             | 11.4 (11.3)          | 14.0 (14.7)          | 6.7 (6.6)           |
| <b>Refinement</b>                     |                      |                      |                     |
| Resolution (Å)                        | 1.78                 | 1.86                 | 1.78                |
| No. measurements                      | 437943               | 241851               | 1537883             |
| No. unique                            | 38268                | 17268                | 228634              |
| $R_{\text{work}} / R_{\text{free}}$   | 0.153 / 0.171        | 0.159 / 0.180        | 0.159 / 0.194       |
| No. atoms                             |                      |                      |                     |
| Protein                               | 1333                 | 1257                 | 16574               |
| Ligand/ion                            | 18                   | 0                    | 16                  |
| Water                                 | 243                  | 135                  | 1541                |
| Average B-factor                      | 18                   | 28                   | 29                  |
| R.m.s. deviations                     |                      |                      |                     |
| Bond lengths (Å)                      | 0.03                 | 0.0210               | 0.018               |
| Bond angles (°)                       | 2.8                  | 1.7                  | 1.7                 |
| PDB codes                             | 4CY9                 | 4CYA                 | 4CYB                |

<sup>a</sup> Number in parentheses is for the last shell, <sup>b</sup>  $R = \sum(\text{Abs}(I - \langle I \rangle) / \sum(I))$

**Supplementary Table 3: A summary of interface characteristics found in DpsA, DpsC and DpsA-DCT dodecamers.**

|          | Interface type       | interface area, Å <sup>2</sup> | $\Delta^i G$ kcal/mol | $\Delta^i G$ P-value | N <sub>HB</sub> | N <sub>SB</sub> | CSS   |
|----------|----------------------|--------------------------------|-----------------------|----------------------|-----------------|-----------------|-------|
| DpsA     | Dimer interface      | 1310.3                         | -7.9                  | 0.552                | 14              | 8               | 0.660 |
|          | Dps-like trimer      | 512.0                          | -7.1                  | 0.260                | 2               | 2               | 0.697 |
|          | Ferritin-like trimer | 742.0                          | -3.5                  | 0.552                | 8               | 7               | 0.295 |
| DpsC     | Dimer interface      | 1870.5                         | -12.8                 | 0.699                | 27              | 27              | 0.525 |
|          | Dps-like trimer      | 820.4                          | -14.2                 | 0.135                | 5               | 0               | 0.706 |
|          | Ferritin-like trimer | 735.0                          | -4.9                  | 0.637                | 8               | 9               | 0.593 |
| DpsA-DCT | Dimer interface      | 1340.3                         | -7.7                  | 0.554                | 12              | 2               | 1.000 |
|          | Dps-like trimer      | 447.2                          | -5.7                  | 0.291                | 2               | 3               | 0.320 |
|          | Ferritin-like trimer | 665.9                          | -2.0                  | 0.628                | 9               | 6               | 0.311 |

**Supplementary Table 4: DpsA N-terminal tail residue inter-subunit interfaces. Shown are the N-tail residues and the residues they interact with from a single symmetry related subunit per interface. C-terminal tail residues are shown in italics. Hb indicates predicted hydrogen bonds.**

| N-tail Residue                                | Dimer Interface | Ferritin-like trimer                              | Total Interfacing Residues |
|-----------------------------------------------|-----------------|---------------------------------------------------|----------------------------|
| Asp-4                                         | -               | -                                                 | <b>0</b>                   |
| Leu-5                                         | -               | -                                                 | <b>0</b>                   |
| Thr-6                                         | -               | -                                                 | <b>0</b>                   |
| Pro-7                                         | Arg-104         | -                                                 | <b>1</b>                   |
| Lys-8                                         | -               | <i>Gly-165 (Hb), Gly-166, Ala-167</i>             | <b>3</b>                   |
| Tyr-9                                         | -               | <i>Arg-158, Glu-162, Gly-166, Leu-168</i>         | <b>4</b>                   |
| Thr-10                                        | -               | Arg-158 (Hb)                                      | <b>1</b>                   |
| Val-11                                        | -               | Glu-151                                           | <b>1</b>                   |
| Pro-12                                        | -               | Thr-119, Val-122, Glu-123, Arg-126 (Hb), Gln-154, | <b>5</b>                   |
| Gln-13                                        | -               | Arg-126                                           | <b>1</b>                   |
| Ile-14                                        | -               | Arg-126                                           | <b>1</b>                   |
| Glu-15                                        | -               | -                                                 | <b>0</b>                   |
| <b>Total Interfacing residues with N-tail</b> |                 |                                                   | <b>17</b>                  |

**Supplementary Table 5: DpsA C-terminal tail residue inter-subunit interfaces. Shown are the C-tail residues and the residues they interact with from a single symmetry related subunit per interface. N-terminal tail residues are shown in italics. Hb and Sb indicate predicted hydrogen bonds and salt bridges.**

| <b>C-Tail Residue</b> | <b>N-terminal trimer</b> | <b>Dps-like trimer</b>                        | <b>Total Interfacing Residues</b> |
|-----------------------|--------------------------|-----------------------------------------------|-----------------------------------|
| Glu-162               | <i>Tyr-9</i>             | Val-48 Arg-104 (Hb, Sb x 2)                   | <b>4</b>                          |
| Ser-163               | -                        | Val-48, Arg-104                               | <b>2</b>                          |
| Ala-164               | -                        | Arg-104, Ala-105                              | <b>2</b>                          |
| Gly-165               | <i>Lys-8 (Hb)</i>        | Arg-104                                       | <b>2</b>                          |
| Gly-166               | <i>Lys-8, Tyr-9</i>      | Arg-104                                       | <b>2</b>                          |
| Ala-167               | <i>Lys-8</i>             | -                                             | <b>1</b>                          |
| Leu-168               | <i>Tyr-9</i>             | -                                             | <b>1</b>                          |
| Ala-169               | -                        | -                                             | <b>0</b>                          |
| Ala-170               | -                        | -                                             | <b>0</b>                          |
|                       |                          | <b>Total Interfacing Residues with C-tail</b> | <b>14</b>                         |

**Supplementary Table 6: DpsA-DCT N-terminal tail residue inter-subunit interfaces. Shown are the N-tail residues and the residues they interact with from a single symmetry related subunit per interface. Hb indicates predicted hydrogen bonds.**

| <b>N-tail Residue</b> | <b>Dimer Interface</b> | <b>Ferritin-like trimer</b>                       | <b>Total Interfacing Residues</b> |
|-----------------------|------------------------|---------------------------------------------------|-----------------------------------|
| Asp-4                 | -                      | -                                                 | <b>0</b>                          |
| Leu-5                 | -                      | -                                                 | <b>0</b>                          |
| Thr-6                 | -                      | -                                                 | <b>0</b>                          |
| Pro-7                 | Arg-104                | -                                                 | <b>1</b>                          |
| Lys-8                 | -                      | -                                                 | <b>0</b>                          |
| Tyr-9                 | -                      | Arg-158, Glu-162 (Hb)                             | <b>2</b>                          |
| Thr-10                | -                      | Arg-158 (Hb)                                      | <b>1</b>                          |
| Val-11                | -                      | Glu-151                                           | <b>1</b>                          |
| Pro-12                | -                      | Thr-119, Val-122, Glu-123, Arg-126 (Hb), Gln-154, | <b>5</b>                          |
| Gln-13                | -                      | Arg-126                                           | <b>1</b>                          |
| Ile-14                | -                      | Arg-126                                           | <b>1</b>                          |
| Glu-15                | -                      | -                                                 | <b>0</b>                          |
|                       |                        | <b>Total Interfacing residues</b>                 | <b>12</b>                         |

**Supplementary Table 7: DpsC N-terminal tail residue inter-subunit interfaces. C-terminal tail residues are shown in italics. Hb and Sb indicates predicted hydrogen bonds and salt bridges.**

| <b>N-tail Residue</b> | <b>Dimer Interface</b>         | <b>Ferritin-like trimer</b>                   | <b>Total Interfacing Residues</b> |
|-----------------------|--------------------------------|-----------------------------------------------|-----------------------------------|
| Arg-28                | Glu-135 (2Hb) (Sb)             | -                                             | <b>1</b>                          |
| Thr-29                | Glu-134, Val-133, Gly-132      | -                                             | <b>3</b>                          |
| Ile-30                | Glu-135, Arg-77, Val-133 (Hb)  | <i>Thr-195, Pro-196</i>                       | <b>5</b>                          |
| Gln-31                | Gly-132, Arg-77, Val-133 (2Hb) | -                                             | <b>3</b>                          |
| Glu-32                | -                              | -                                             | <b>0</b>                          |
| Phe-33                | -                              | -                                             | <b>0</b>                          |
| Gly-34                | -                              | -                                             | <b>0</b>                          |
| Thr-35                | -                              | -                                             | <b>0</b>                          |
| Val-36                | -                              | -                                             | <b>0</b>                          |
| Lys-37                | <i>Arg-77</i>                  | Glu-190 (Hb), (2Sb)                           | <b>2</b>                          |
| Gln-38                | -                              | -                                             | <b>0</b>                          |
| Phe-39                | -                              | Trp-186, Ala-189, Glu-190                     | <b>3</b>                          |
| Pro-40                | -                              | Leu-144, Glu-148, Ala-185                     | <b>3</b>                          |
| Val-41                | -                              | Glu-148, Leu-151, Glu-182                     | <b>3</b>                          |
| Vla-42                | -                              | Glu-148 (Hb), Leu-151, Thr-152, His-155       | <b>4</b>                          |
| Leu-43                | -                              | His-155, Glu-182                              | <b>2</b>                          |
| Thr-44                | -                              | -                                             | <b>0</b>                          |
|                       |                                | <b>Total Interfacing Residues with N-tail</b> | <b>29</b>                         |

**Supplementary Table 8: DpsC C-terminal tail residue inter-subunit interfaces. N-terminal tail residues are shown in italics. Hb indicates predicted hydrogen bonds.**

| <b>C-Tail Residue</b> | <b>N-terminal trimer</b> | <b>Dps-like trimer</b>                        | <b>Total Interfacing Residues</b> |
|-----------------------|--------------------------|-----------------------------------------------|-----------------------------------|
| Val-193               | <i>Ile-30, Lys-37</i>    | Gly-78, Arg-77                                | <b>4</b>                          |
| Asp-194               | -                        | -                                             | <b>0</b>                          |
| Thr-195               | <i>Ile-30, Lys-37</i>    | Gly-78, Arg-77, Val-136                       | <b>5</b>                          |
| Pro-196               | <i>Ile-30, Lys-37</i>    | Glu-135, Val-136, Pro-137                     | <b>5</b>                          |
| Leu-197               | -                        | Pro-137                                       | <b>1</b>                          |
| Val-198               | -                        | Pro-137, Leu-192, Asp-194                     | <b>3</b>                          |
| His-199               | -                        | Ser-138, Pro-137, Ser-141 (Hb) Leu-192        | <b>4</b>                          |
|                       |                          | <b>Total Interfacing Residues with C-tail</b> | <b>22</b>                         |



**Supplementary Table 9: PISA statistics for Dps encoded by of mesophilic or extremophilic (\*) organisms.**

| Organism (PDB ID)                   | Interface type              | Interface area, Å <sup>2</sup> | $\Delta^iG$ kcal/mol | $\Delta^iG$ P-value | N <sub>HB</sub> | N <sub>SB</sub> | CSS   |
|-------------------------------------|-----------------------------|--------------------------------|----------------------|---------------------|-----------------|-----------------|-------|
| <i>S. coelicolor</i> DpsA           | <b>Dimer interface</b>      | 1310.3                         | -7.9                 | 0.552               | 14              | 8               | 0.66  |
|                                     | <b>Dps-like trimer</b>      | 512.0                          | -7.1                 | 0.260               | 2               | 2               | 0.697 |
|                                     | <b>Ferritin-like trimer</b> | 742.0                          | -3.5                 | 0.552               | 8               | 7               | 0.295 |
| <i>S. coelicolor</i> DpsC           | <b>Dimer interface</b>      | 1870.5                         | -12.8                | 0.699               | 27              | 27              | 0.525 |
|                                     | <b>Dps-like trimer</b>      | 820.4                          | -14.2                | 0.135               | 5               | 0               | 0.706 |
|                                     | <b>Ferritin-like trimer</b> | 735.0                          | -4.9                 | 0.637               | 8               | 9               | 0.593 |
| <i>M. smegmatis</i> Dps1 (1VEI)     | <b>Dimer interface</b>      | 1303.9                         | -7.0                 | 0.673               | 14              | 8               | 0.153 |
|                                     | <b>Dps-like trimer</b>      | 482.9                          | -6.6                 | 0.268               | 4               | 2               | 0.276 |
|                                     | <b>Ferritin-like trimer</b> | 793.5                          | -8.5                 | 0.181               | 6               | 7               | 0.341 |
| <i>E. coli</i> Dps (1DPS)           | <b>Dimer interface</b>      | 1531.1                         | -11.8                | 0.262               | 16              | 7               | 0.598 |
|                                     | <b>Dps-like trimer</b>      | 399.2                          | -6.2                 | 0.179               | 3               | 0               | 0.238 |
|                                     | <b>Ferritin-like trimer</b> | 682.0                          | -0.2                 | 0.652               | 12              | 9               | 0.210 |
| <i>M. smegmatis</i> Dps2 (2Z90)     | <b>Dimer interface</b>      | 1266.4                         | -4.7                 | 0.496               | 17              | 13              | 0.368 |
|                                     | <b>Dps-like trimer</b>      | 495.6                          | -1.0                 | 0.561               | 8               | 5               | 0.320 |
|                                     | <b>Ferritin-like trimer</b> | 970.2                          | 2.2                  | 0.751               | 17              | 15              | 0.197 |
| <i>L. innocua</i> Dps (1QGH)        | <b>Dimer interface</b>      | 1141.5                         | -17.1                | 0.116               | 14              | 10              | 0.510 |
|                                     | <b>Dps-like trimer</b>      | 492.5                          | -5.4                 | 0.380               | 5               | 3               | 0.202 |
|                                     | <b>Ferritin-like trimer</b> | 429.4                          | -3.7                 | 0.472               | 4               | 5               | 0.157 |
| <i>K. radiotolerans</i> Dps* (4A25) | <b>Dimer interface</b>      | 1257.9                         | -7.3                 | 0.498               | 22              | 17              | 0.372 |
|                                     | <b>C-terminal trimer</b>    | 573.5                          | -2.9                 | 0.542               | 9               | 5               | 0.390 |
|                                     | <b>N-terminal trimer</b>    | 1079.4                         | -6.6                 | 0.447               | 11              | 6               | 0.569 |

|                                        |                          |        |       |       |    |    |       |
|----------------------------------------|--------------------------|--------|-------|-------|----|----|-------|
| <i>T. elongatus</i> Dps *<br>(2C41)    | <b>Dimer interface</b>   | 1167.1 | -14.5 | 0.327 | 12 | 10 | 1.000 |
|                                        | <b>C-terminal trimer</b> | 798.7  | -12.0 | 0.191 | 9  | 5  | 1.000 |
|                                        | <b>N-terminal trimer</b> | 471.8  | -3.0  | 0.670 | 4  | 4  | 0.198 |
| <i>D. radiodurans</i> Dps *<br>(2C2F)  | <b>Dimer interface</b>   | 1627.5 | -14.8 | 0.158 | 20 | 8  | 0.221 |
|                                        | <b>C-terminal trimer</b> | 533.5  | -0.8  | 0.675 | 10 | 9  | 0.117 |
|                                        | <b>N-terminal trimer</b> | 784.1  | -5.0  | 0.249 | 14 | 3  | 0.206 |
| <i>S. solfataricus</i> Dps *<br>(2CLB) | <b>Dimer interface</b>   | 1293.0 | -9.2  | 0.317 | 23 | 19 | 0.326 |
|                                        | <b>C-terminal trimer</b> | 507.1  | -8.8  | 0.086 | 4  | 2  | 0.309 |
|                                        | <b>N-terminal trimer</b> | 904.2  | -7.2  | 0.249 | 9  | 2  | 0.333 |
| <i>H. salinarum</i> Dps *<br>(1MOJ)    | <b>Dimer interface</b>   | 1748.4 | -11.8 | 0.219 | 32 | 14 | 0.465 |
|                                        | <b>C-terminal trimer</b> | 878.2  | -8.7  | 0.115 | 12 | 5  | 0.543 |
|                                        | <b>N-terminal trimer</b> | 826.9  | -3.3  | 0.442 | 16 | 14 | 0.484 |
